# Supplementary material for: Engineered hybrid insecticidal protein improves resistance to lepidopteran insects in rice (Oryza sativa L.) and maize (Zea mays L.)
Source: Research Square preprint supplement (doi:10.21203/rs.3.rs-1226934/v1), 2022-01-14
Supplement: Supplementary file 1 [file 04f3a77cd1ce0cba9de46463.pdf]

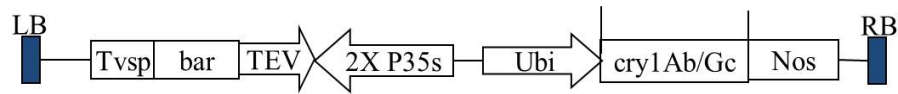

**Supplementary Figure 1.** A schematic diagram of the T-DNA region of the plant expression vector pTF101.1-ubi-cry1Ab/1Gc. Tvsp: terminator; *bar*: resistance gene encoding sequence; TEV: enhancer; 2×P35s: *double cauliflower mosaic virus* (CaMV) 35S promoter; Ubi: maize *ubiquitin* promoter; *Cry1Ab/1Gc*: *cry1Ab/1Gc* gene encoding sequence; Nos: nopaline synthase terminator.

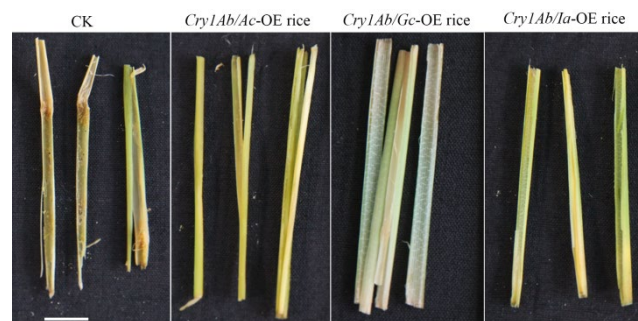

**Supplementary Figure 2.** Insect resistance performance of rice stems in the laboratory. CK: Jijing 88; Cry1Ab/Ac-OE rice: transgenic *Cry1Ab/Ac* rice; Cry1Ab/Gc-OE rice: transgenic *Cry1Ab/Gc* rice; Cry1Ab/Ia-OE rice: transgenic *Cry1Ab/Ia* rice. Scale bar, 1 cm

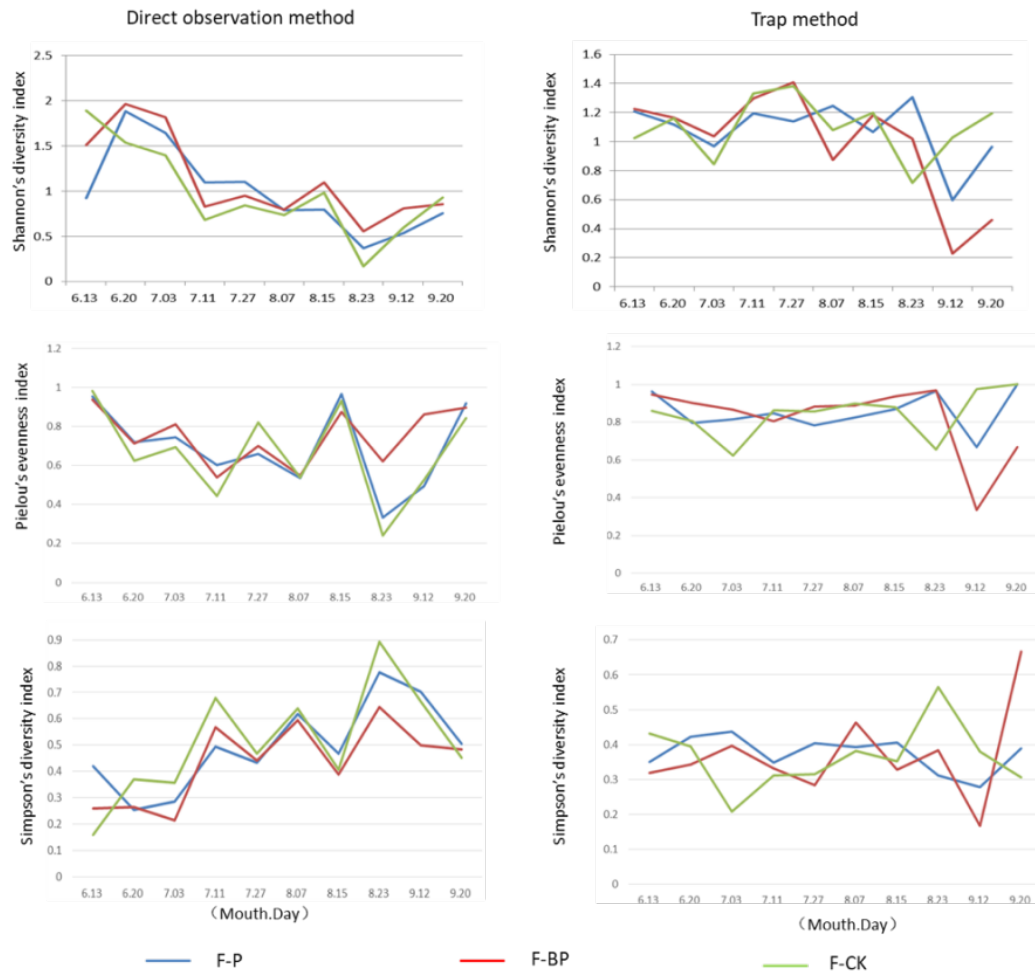

**Supplementary Figure 3.** Effects on arthropod community structure by direct observation method and pitfall trap method. The abscissa represents survey time. Three indices were used to analyze the dynamics of the arthropod community: Shannon's diversity index, Pielou's diversity index, and Simpson's diversity index.

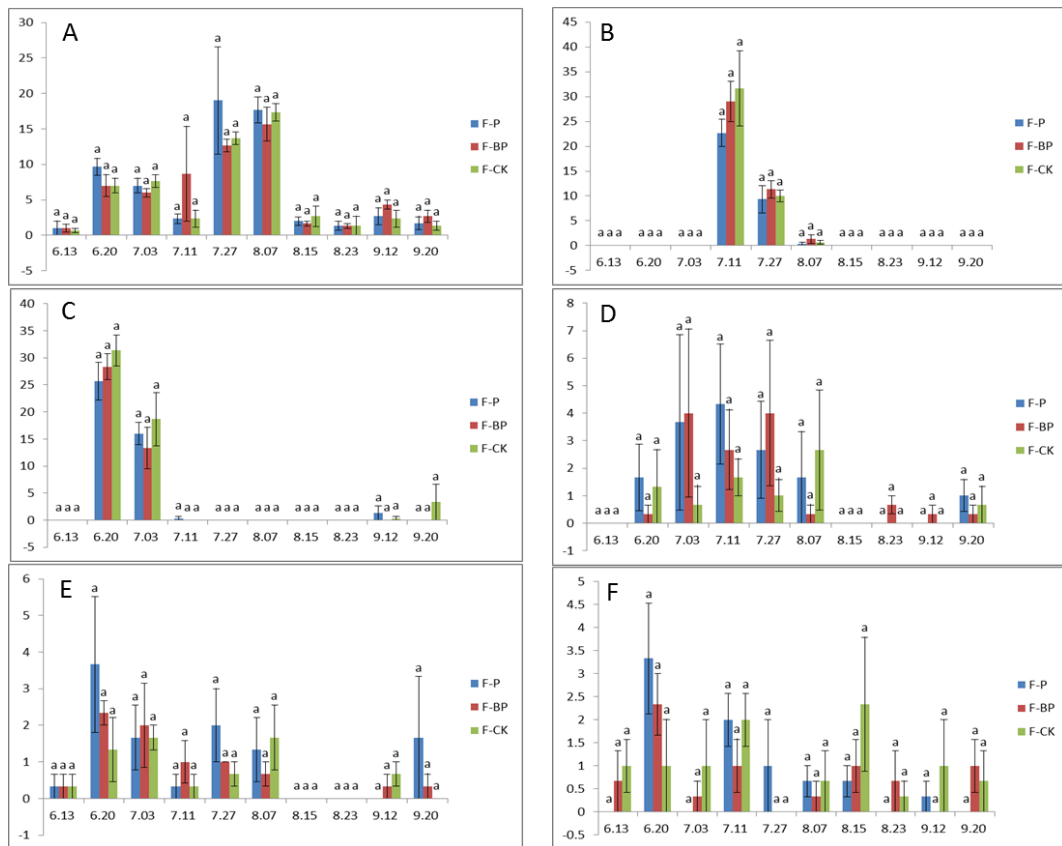

**Supplementary Figure 4.** Effects on arthropod community structure (direct observation method). (A) *Harmonia axyridis*; (B) ladybird larvae; (C) aphids; (D) *Monolepta hieroglyphica*; (E) spiders; (F) *Propylaea japonica*. F-CK: non-Bt maize control; F-P: Cry1Ab/Gc maize spraying herbicide glufosinate; F-BP: Cry1Ab/Gc maize with no glufosinate application. The ordinate represents the average number of individuals in each community  $\pm$  SD, and the abscissa represents survey time. Statistically significant differences according to one-way ANOVA (a:  $P > 0.05$ ).

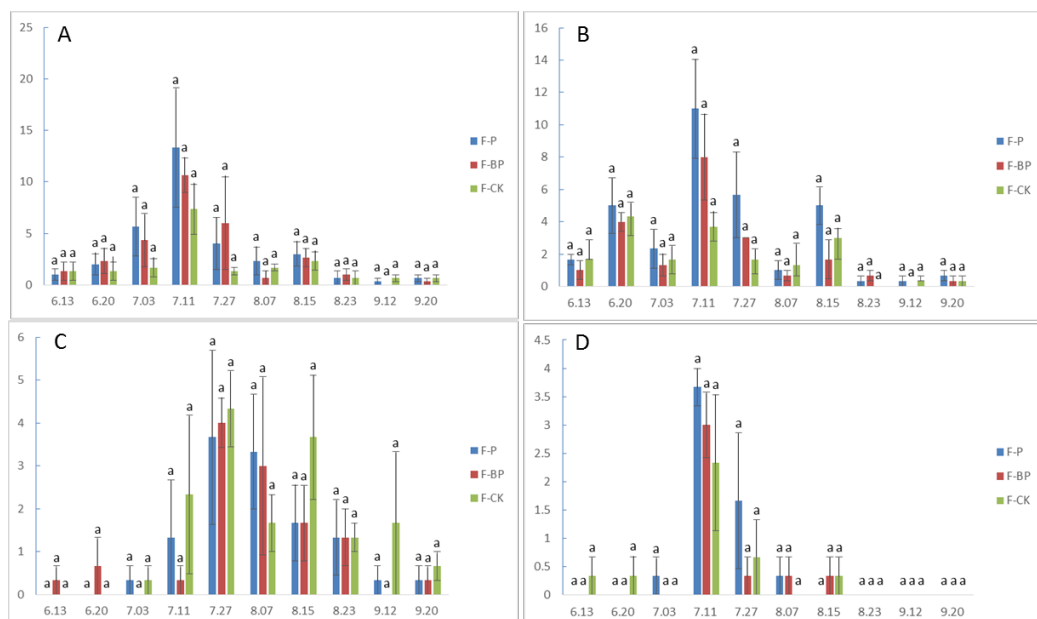

**Supplementary Figure 5.** Effects on arthropod community structure (Pitfall trap method). (A) *Teleogryllus infernalis*; (B) Earwig *furculidae*; (C) *opiliones*; (D) *Carabidae sp.* F-CK: Non-Bt maize control; F-P: Cry1Ab/Gc maize spraying herbicide glufosinate; F-BP: Cry1Ab/Gc maize with no glufosinate application. The ordinate represents the average number of individuals in each community  $\pm$  SD, and the abscissa represents survey time. Statistically significant differences according to one-way ANOVA ( $\alpha$ :  $P>0.05$ ).

**Supplementary Table 1.** Mortality rate of rice stem borer feeding on rice stems

| Plant line           | No. of rice stem borers | Average mortality rate of rice stem borer (%) |
|----------------------|-------------------------|-----------------------------------------------|
| CK                   | 50                      | 18.00 $\pm$ 0.13                              |
| <i>cry1Ab/Gc</i> -OE | 50                      | 100.00 $\pm$ 0.00 <sup>**</sup>               |
| <i>cry1Ab/Ac</i> -OE | 50                      | 96.00 $\pm$ 0.00 <sup>**</sup>                |
| <i>cry1Ab/Ia</i> -OE | 50                      | 96.00 $\pm$ 0.00 <sup>**</sup>                |

Notes: Means ( $\pm$ SE) within a column followed by different letters are significantly different ( $t$ -test,  $**P<0.01$ ).

**Supplementary Table 2.** Insect resistance of transgenic lines against Asian corn borer

| Maize lines | No. of plants | No. of channels               | Length of tunnel (cm)         | No. of live larvae            |
|-------------|---------------|-------------------------------|-------------------------------|-------------------------------|
| CK          | 12            | 2.92 $\pm$ 0.62               | 4.75 $\pm$ 1.23               | 0.75 $\pm$ 0.25               |
| HG-1        | 14            | 0.36 $\pm$ 0.17 <sup>**</sup> | 1.36 $\pm$ 1.00 <sup>**</sup> | 0.00 $\pm$ 0.00 <sup>**</sup> |
| HG-2        | 11            | 0.82 $\pm$ 0.30 <sup>**</sup> | 0.91 $\pm$ 0.67 <sup>**</sup> | 0.00 $\pm$ 0.00 <sup>**</sup> |
| HG-3        | 15            | 0.80 $\pm$ 0.20 <sup>**</sup> | 1.83 $\pm$ 0.69 <sup>**</sup> | 0.13 $\pm$ 0.13 <sup>**</sup> |

Notes: Means ( $\pm$ SE) within a column followed by different letters are significantly different (T test,  $**P<0.01$ ).
